# Supplementary material
Source: publisher figshare collection journal article supplement (https://karger.figshare.com/ndownloader/files/28411122)
Supplement: Supplementary file 1 [file 28411122]

## Sheet: Sheet1
Diagnostic technique		Number of studies	Sensitivity	Specificity	AUC of ROC value
Visual examination methods	Primary	12	0.05-1	0.51-1	0.58-0.98
	Permanent	23	0.04-1	0.44-1	0.56-0.99
Bitewing radiography	Primary	13	0.14-0.96	0.62-1	0.58-0.95
	Permanent	14	0-0.93	0.6-1	0.51-0.74
DIAGNOdent	Primary	3	0.43-1	0.5-1	NA
	Permanent	15	0.48-1	0.54-1	0.55-0.94
DIAGNOdent Pen	Primary	8	0.16-1	0.44-1	0.57-0.95
	Permanent	11	0.32-0.97	0.2-1	0.40-0.95
Vista Proof	Permanent	4	0.26-0.92	0.41-0.98	0.72-0.97
CarieScan Pro	Primary	3	0.72-0.91	0-0.92	0.47-0.92
	Permanent	2	0.3-0.92	0.75-0.97	0.97
Soprolife	Primary	1	0.86-0.98	0.92-0.96	0.94-0.98
	Permanent	2	0.93-0.95	0.55-0.88	0.89
Appendix table 3	Ranges of the basic diagnostic methods by type of dentition. Note that studies with mixed dentitions were exlcuded from this table.
NA: Not available
